# Supplementary material for: Prevention of insulin self-aggregation by a protic ionic liquid
Source: Royal Society of Chemistry journal article supplement (doi:10.1039/c2ra22277a), 2012-11-08
Supplement: c2ra22277a.pdf [file c2ra22277a.pdf]

## Supplementary information

### Prevention of Insulin Self-aggregation by Protic Ionic Liquid

Awanish Kumar and Pannuru Venkatesu\*

Department of Chemistry, University of Delhi, Delhi-110 007

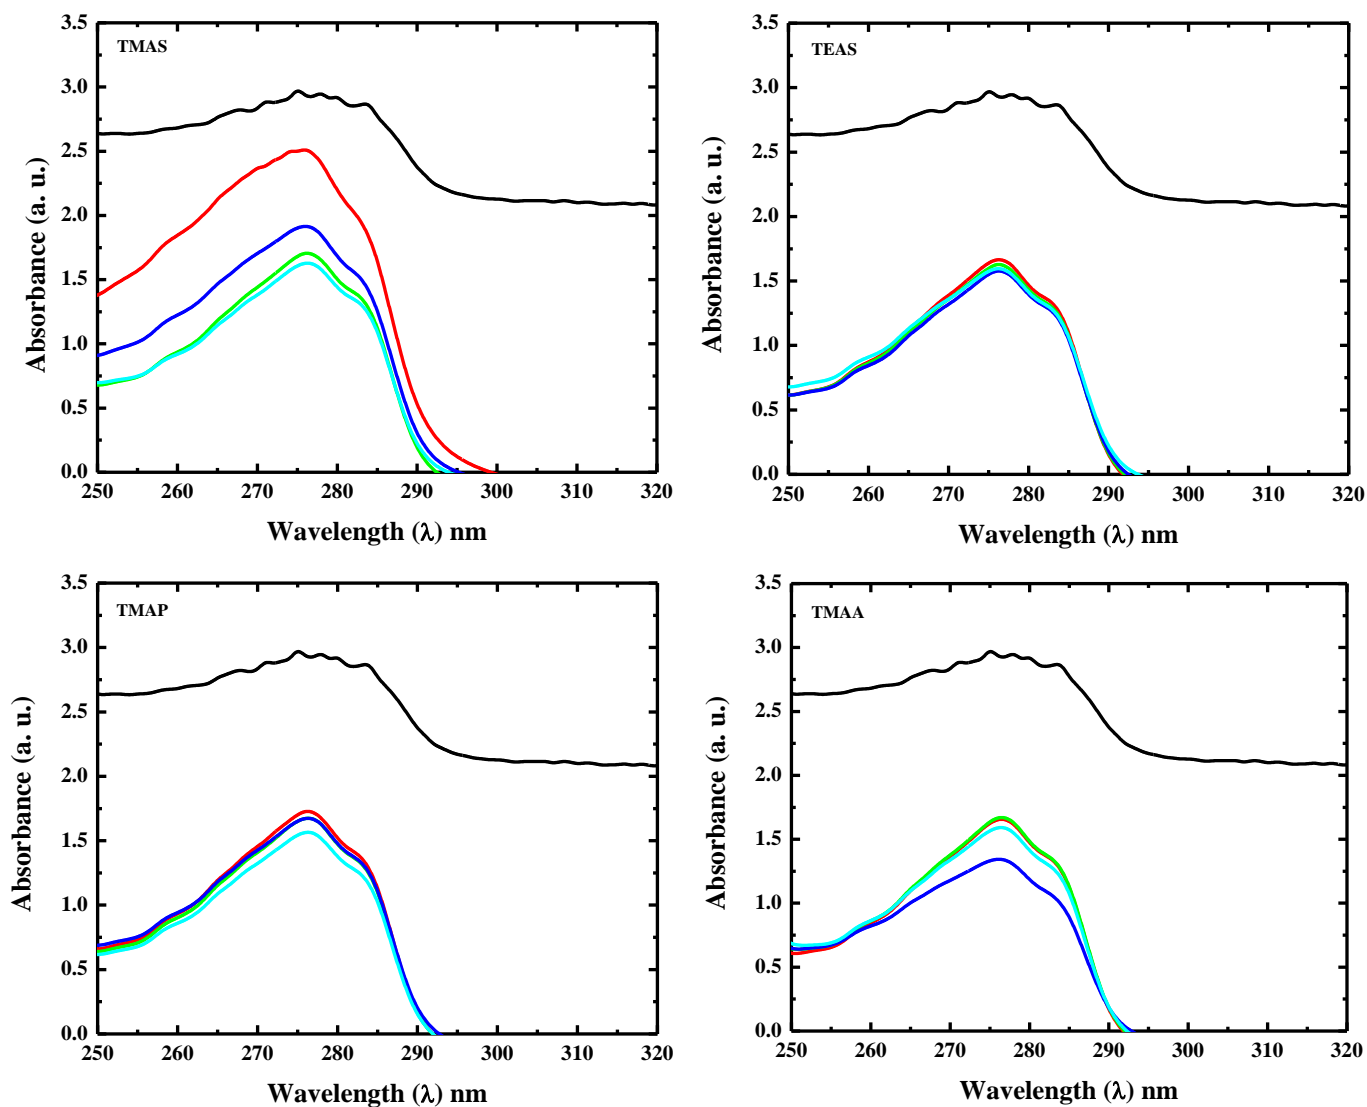

**Figure IS.** UV-absorbance of *In* in 0.0 M (black), 0.5 M (red), 1.0 M (green), 1.5 M (blue) and 2.0 M (cyan) of ILs.

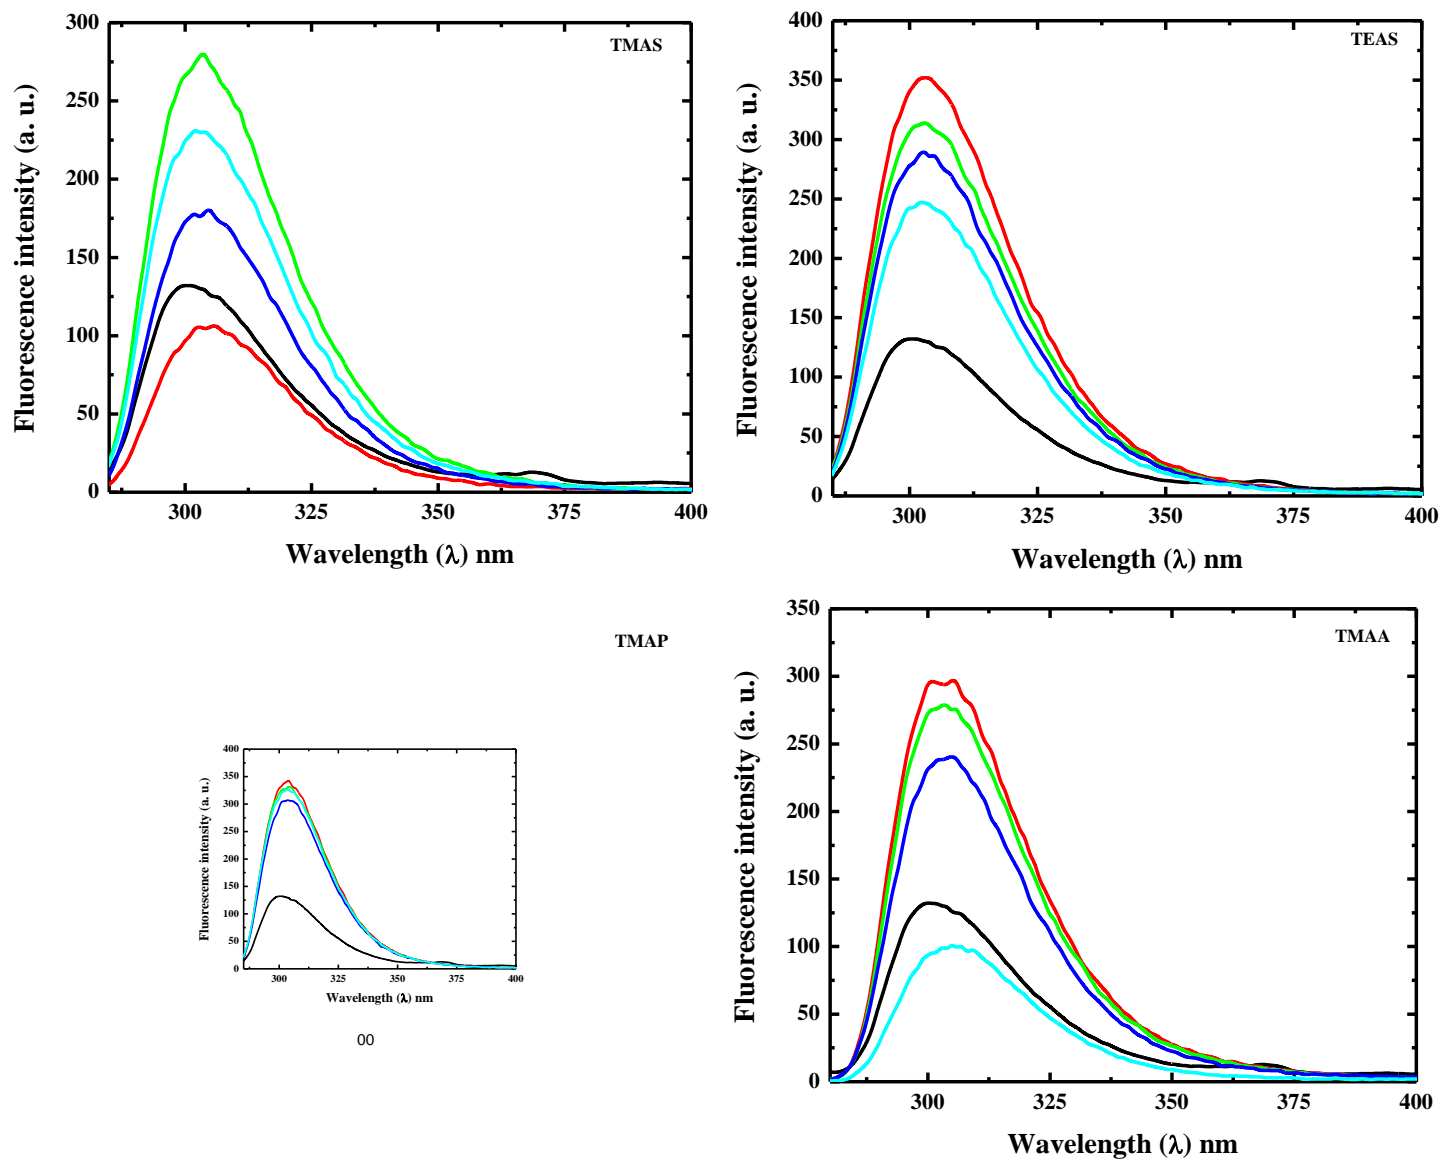

**Figure IIS.** Fluorescence spectroscopy of *In* in 0.0 M (black), 0.5 M (red), 1.0 M (green), 1.5 M (blue) and 2.0 M (cyan) of ILs.

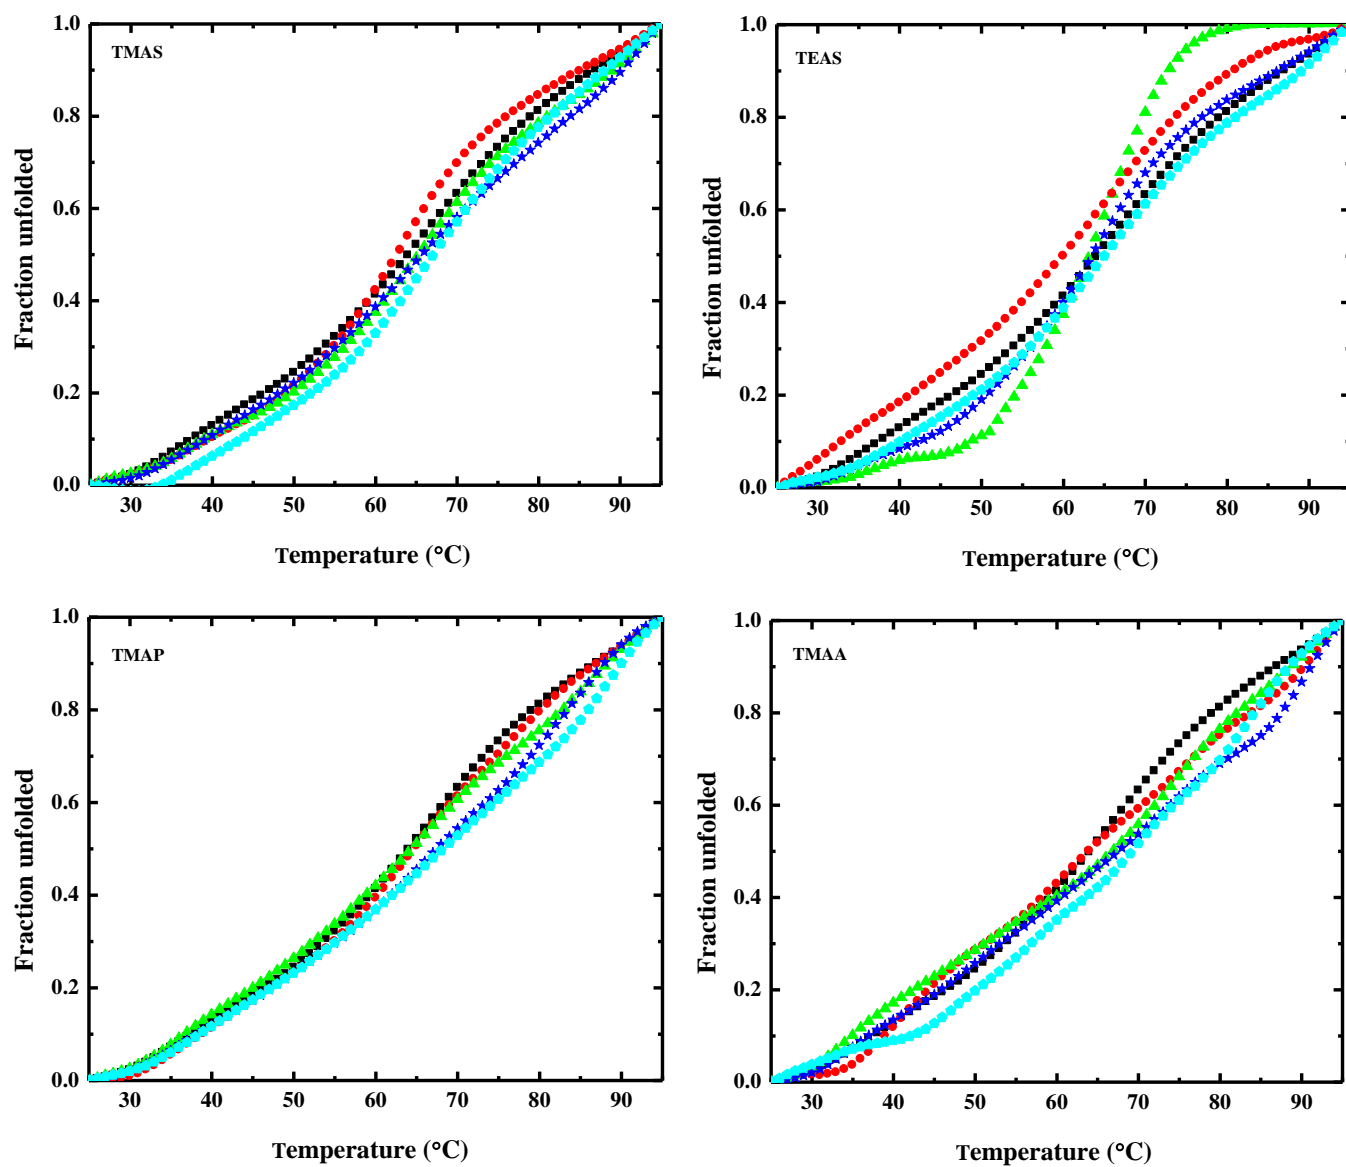

**Figure IIS.** Fraction unfolded of *In* in 0.0M (black), 0.5 M (red), 1.0 M (green), 1.5 M (blue) and 2.0 M (cyan) of ILs.

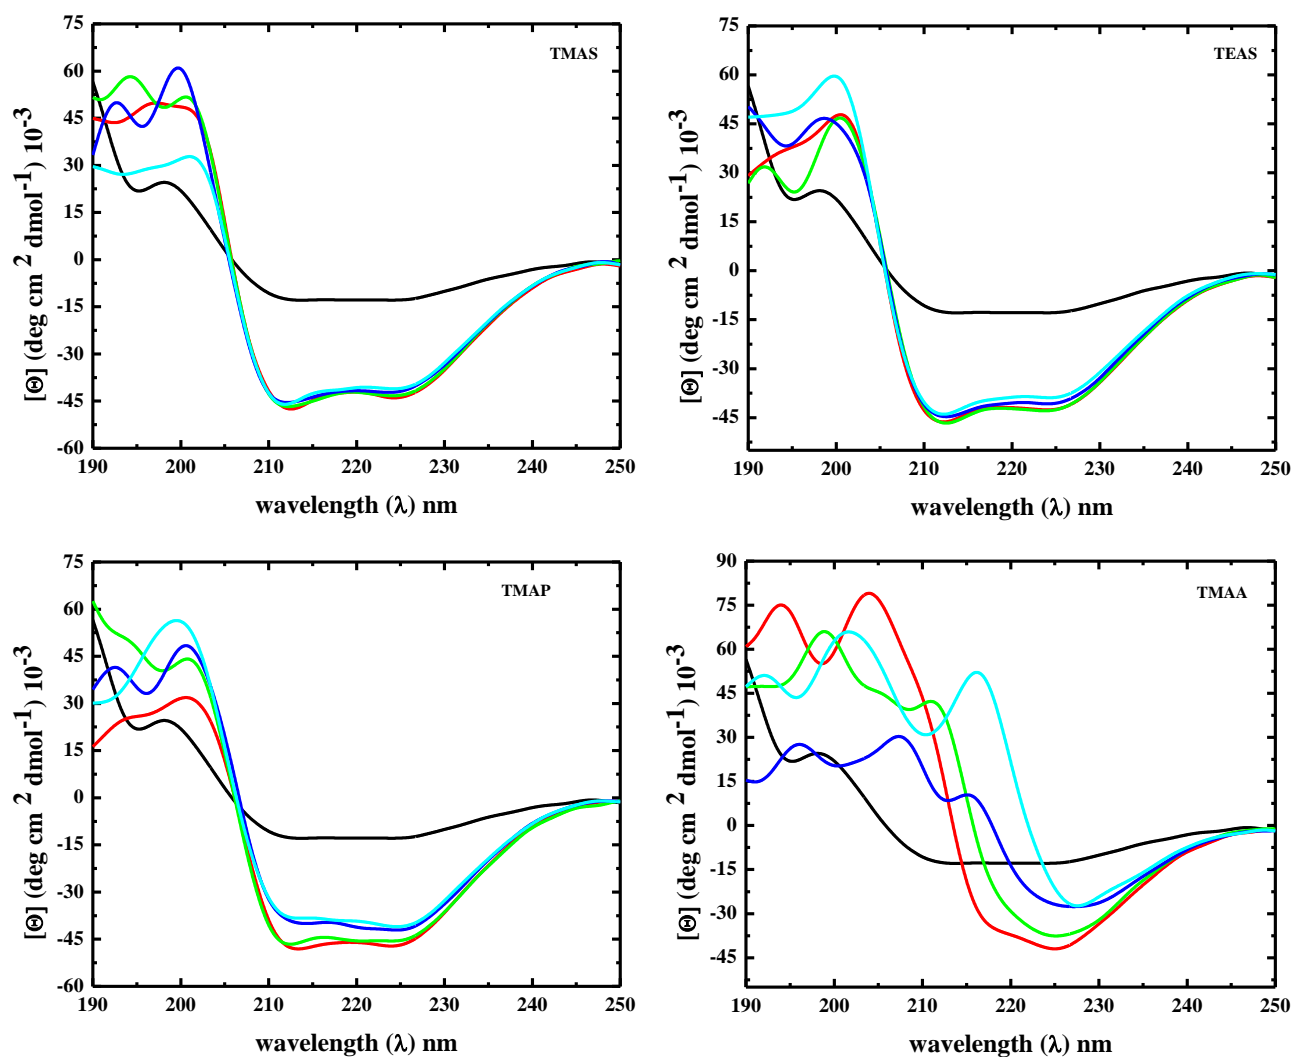

**Figure IVS.** Far UV-CD of *In* in 0.0 M (black), 0.5 M (red), 1.0 M (green), 1.5 M (blue) and 2.0 M (cyan) of ILs.

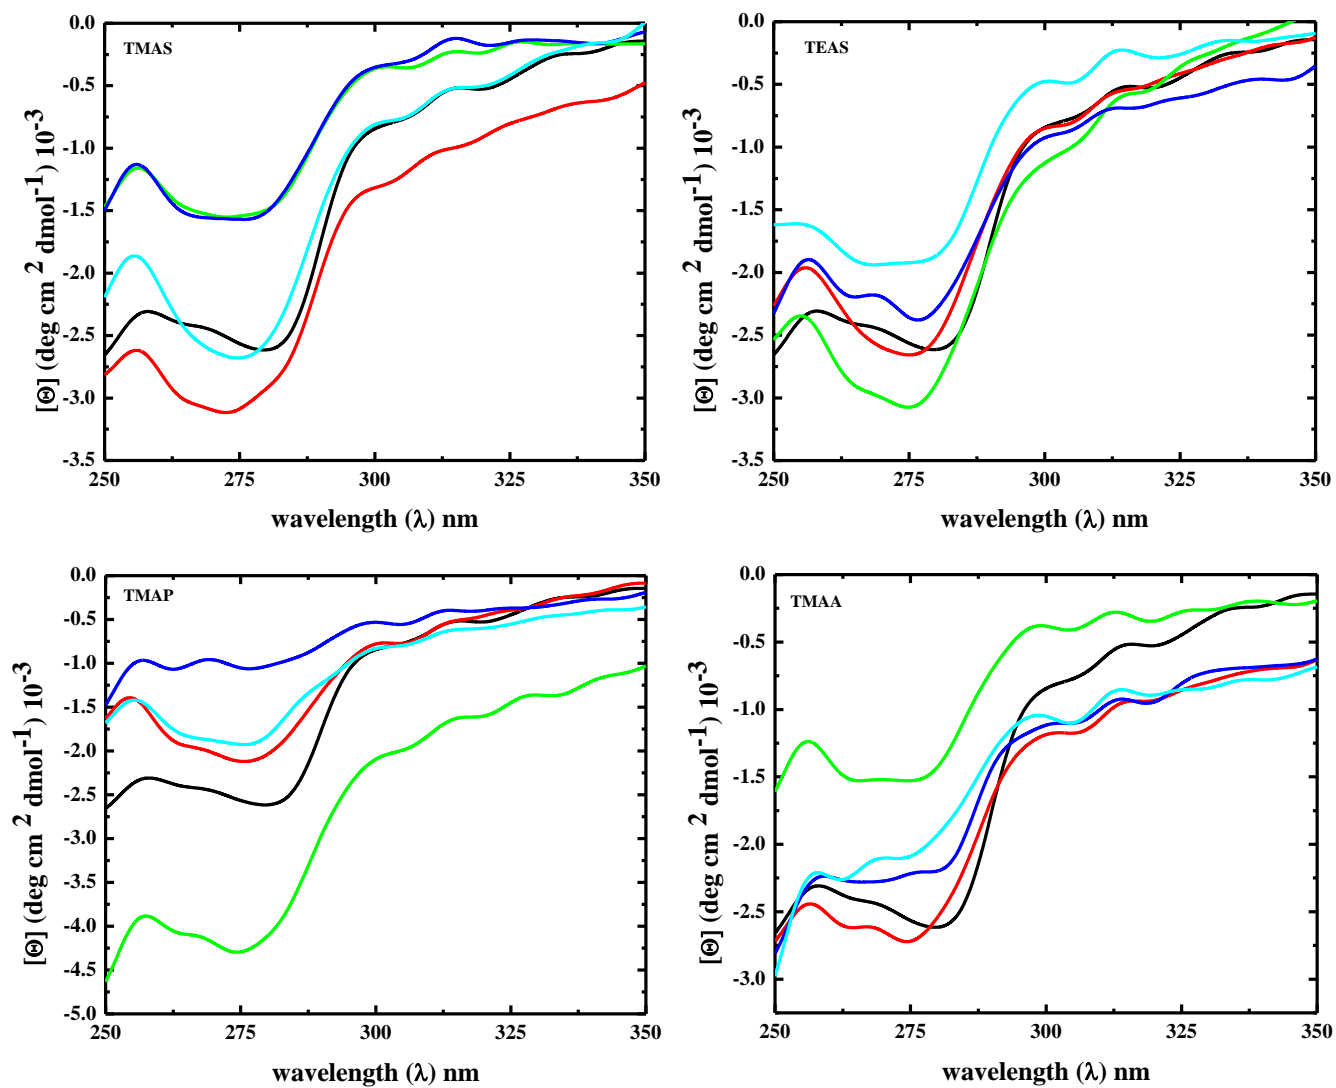

00000

**Figure VS.** Near UV-CD of *In* in 0.0 M (black), 0.5 M (red), 1.0 M (green), 1.5 M (blue) and 2.0 M (cyan) of ILs.

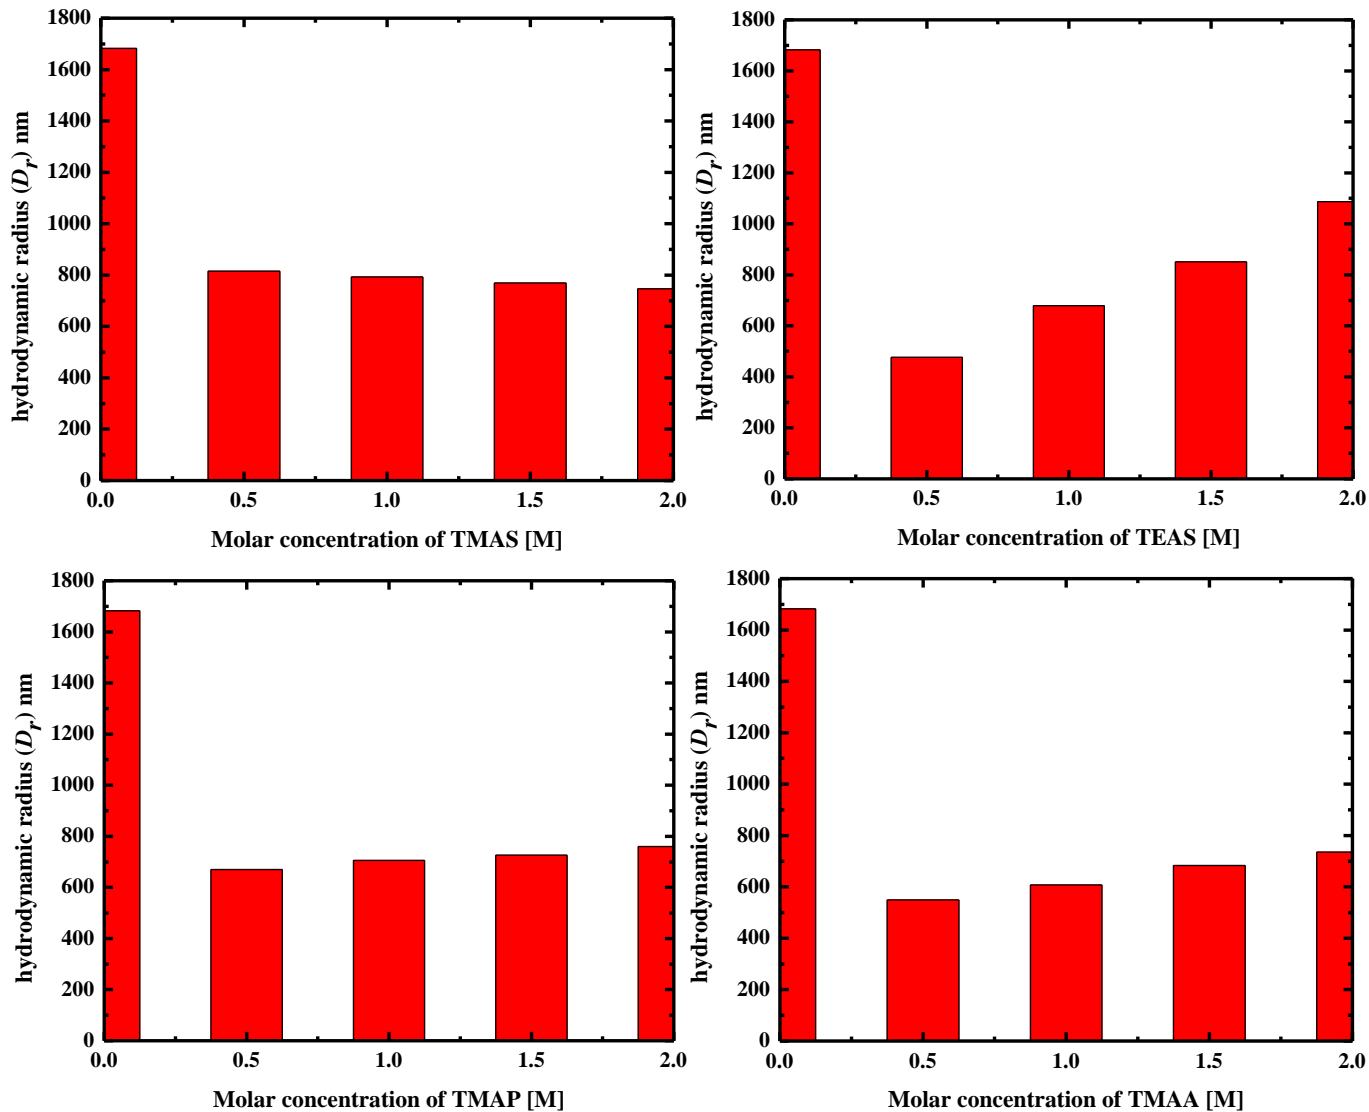

**Figure VI.4.** Hydrodynamic radius obtained by DLS measurements for *In* in various concentrations of PILs as a function of IL concentration.

**Table IS.** Thermodynamic parameters and hydrodynamic radius ( $D_r$ ) calculated for *In* in the presence of various concentrations of PILs.

| Concentration of ILS [M] | $T_m$ (°C) | Free Energy of unfolding ( $\Delta G_u$ ) $\text{kJmol}^{-1}$ | Enthalpy of unfolding ( $\Delta H_u$ ) $\text{kJmol}^{-1}$ | Heat Capacity of unfolding ( $\Delta C_p$ ) $\text{kJmol}^{-1}\text{K}^{-1}$ | Hydrodynamic radius ( $D_r$ ) nm |
|--------------------------|------------|---------------------------------------------------------------|------------------------------------------------------------|------------------------------------------------------------------------------|----------------------------------|
| 0.0 M (Pure <i>In</i> )  | 63.9       | 1.944                                                         | 79.381                                                     | 0.235                                                                        | 1682.0                           |
| <b>TMAS</b>              |            |                                                               |                                                            |                                                                              |                                  |
| 0.5 M                    | 63.9       | 1.943                                                         | 81.504                                                     | 0.240                                                                        | 815.4                            |
| 1.0 M                    | 63.0       | 1.938                                                         | 72.996                                                     | 0.214                                                                        | 792.2                            |
| 1.5 M                    | 65.0       | 1.949                                                         | 86.143                                                     | 0.253                                                                        | 769.3                            |
| 2.0 M                    | 65.9       | 1.955                                                         | 95.890                                                     | 0.285                                                                        | 746.2                            |
| <b>TEAS</b>              |            |                                                               |                                                            |                                                                              |                                  |
| 0.5 M                    | 59.8       | 1.919                                                         | 78.021                                                     | 0.236                                                                        | 476.6                            |
| 1.0 M                    | 63.1       | 1.938                                                         | 94.416                                                     | 0.279                                                                        | 679.6                            |
| 1.5 M                    | 63.8       | 1.943                                                         | 108.094                                                    | 0.320                                                                        | 851.4                            |
| 2.0 M                    | 65.0       | 1.950                                                         | 154.145                                                    | 0.458                                                                        | 1087                             |
| <b>TMAP</b>              |            |                                                               |                                                            |                                                                              |                                  |
| 0.5 M                    | 65.0       | 1.950                                                         | 62.881                                                     | 0.183                                                                        | 670.2                            |
| 1.0 M                    | 64.3       | 1.946                                                         | 68.939                                                     | 0.202                                                                        | 705.6                            |
| 1.5 M                    | 67.9       | 1.969                                                         | 72.414                                                     | 0.214                                                                        | 726.2                            |
| 2.0 M                    | 69.0       | 1.973                                                         | 87.977                                                     | 0.260                                                                        | 759.7                            |
| <b>TEAP</b>              |            |                                                               |                                                            |                                                                              |                                  |
| 0.5 M                    | 63.7       | 1.942                                                         | 142.033                                                    | 0.421                                                                        | 728.0                            |
| 1.0 M                    | 70.1       | 1.979                                                         | 199.295                                                    | 0.574                                                                        | 744.8                            |
| 1.5 M                    | 73.5       | 1.998                                                         | 239.974                                                    | 0.681                                                                        | 767.3                            |
| 2.0 M                    | 79.3       | 2.032                                                         | 263.998                                                    | 0.769                                                                        | 779.9                            |
| <b>TMAA</b>              |            |                                                               |                                                            |                                                                              |                                  |
| 0.5 M                    | 63.9       | 1.943                                                         | 57.468                                                     | 0.168                                                                        | 549.0                            |
| 1.0 M                    | 66.9       | 1.961                                                         | 68.102                                                     | 0.200                                                                        | 607.2                            |
| 1.5 M                    | 67.9       | 1.966                                                         | 64.706                                                     | 0.191                                                                        | 682.9                            |
| 2.0 M                    | 69.0       | 1.973                                                         | 81.278                                                     | 0.237                                                                        | 735.7                            |
